# Supplementary material for: Low GAS5 Levels as a Predictor of Poor Survival in Patients with Lower-Grade Gliomas
Source: Hindawi journal article supplement (doi:10.1155/2019/1785042), 2019-02-03
Supplement: f1 [file 1785042.f1.pdf]

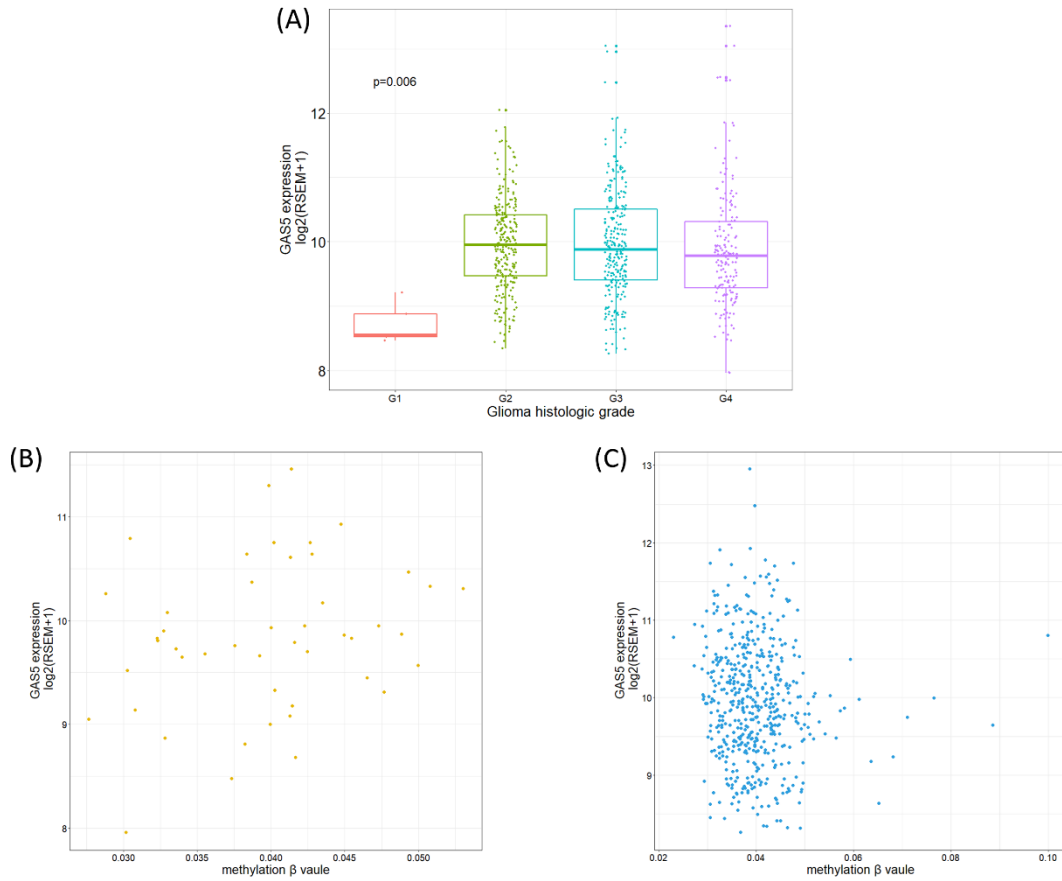

**Figure. S1**

The GAS5 expression in different stages of glioma (a) and the correlation of GAS5 methylation level and GAS5 expression level in GBM (b) and LGG (c) tissues.

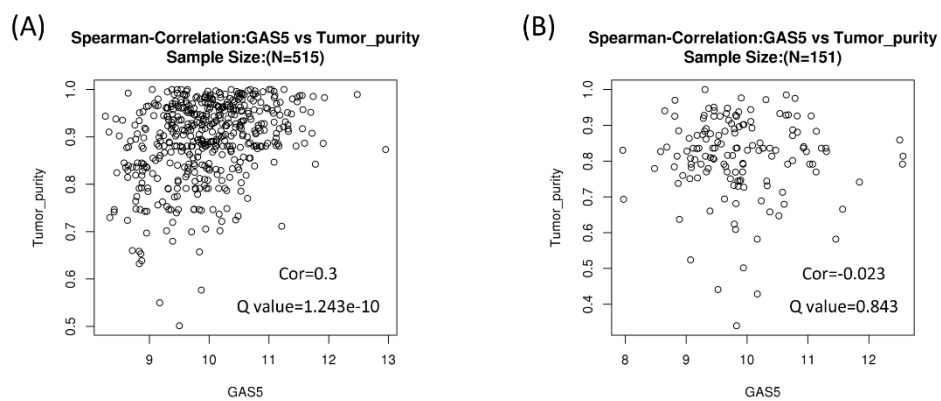

**Figure. S2**

The associations between GAS5 expression level and tumor purity in LGG (a) and GBM (b) patients.

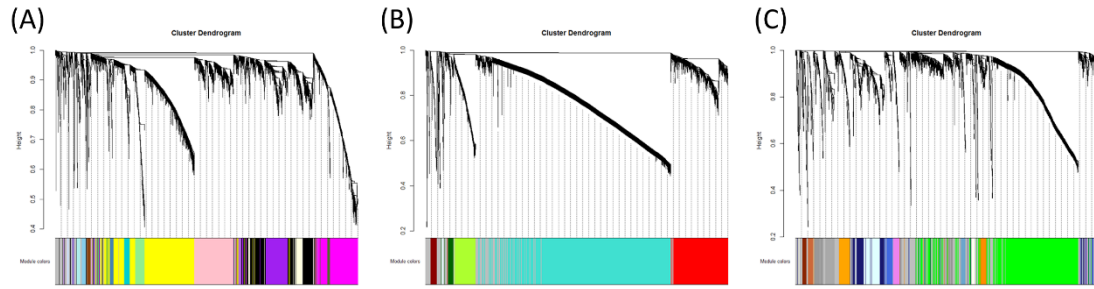

**Figure. S3**  
The dendrogram of modules identified by WGCNA.

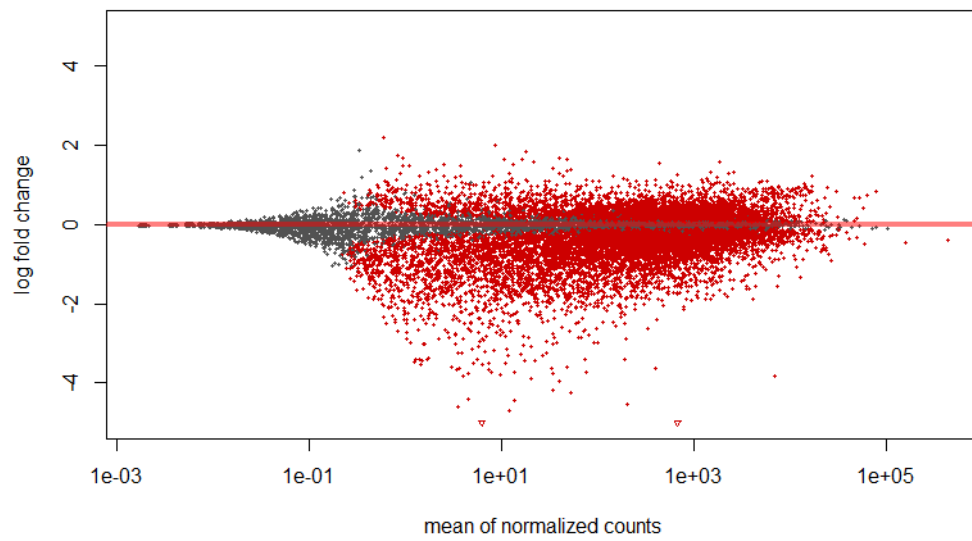

**Figure. S4**  
The MAplot of significant differentially expressed genes in high GAS5 expression and low GAS5 expression groups from LGG tissues.
